# Supplementary material for: Artificial neural network-based QSAR model for predicting degradation techniques of pharmaceutical contaminants in water bodies with experimental verification
Source: Royal Society of Chemistry journal article supplement (doi:10.1039/d4ew00137k), 2024-01-01
Supplement: d4ew00137k1.pdf [file d4ew00137k1.pdf]

## SUPPORTING INFORMATION

# Artificial neural network-based QSAR model for predicting degradation techniques of pharmaceutical contaminants in water bodies with experimental verification.

Jhon-Alex Gonzalez-Amaya,<sup>1</sup> Andrea-Nadith Niño-Colmenares,<sup>1</sup> Andrés-Felipe Cárdenas Rodríguez <sup>1</sup> and James Guevara-Pulido\*<sup>1</sup>

INQA Research Group,<sup>1</sup> Química Farmacéutica,<sup>1</sup> Universidad El Bosque,<sup>1</sup> Bogotá D.C, Colombia.

\*joguevara@unbosque.edu.co

### QSAR MODELS

|                                                                                                                  |    |
|------------------------------------------------------------------------------------------------------------------|----|
| Table 1. Models performed in validation of the Ozonization method (Met 1) .....                                  | 2  |
| Figure 1. Heatmap of model M6Met1 .....                                                                          | 2  |
| Figure 2. Coefficient of determination ( $R^2$ ) obtained in validated model M6Met1 .....                        | 2  |
| Figure 3. Comparison of experimental data vs. predicted data from model M6Met1 .....                             | 3  |
| Table 2. Models performed in validation of the Ozonization + H <sub>2</sub> O <sub>2</sub> method (Met 2) .....  | 3  |
| Figure 4. Heatmap of model M1Met2 .....                                                                          | 4  |
| Figure 5. Coefficient of determination ( $R^2$ ) obtained in validated model M1Met2 .....                        | 4  |
| Figure 6. Comparison of experimental data vs. predicted data from model M1Met2 .....                             | 4  |
| Table 3. Models performed in validation of the activated carbon method (Met 3) .....                             | 5  |
| Figure 7. Heatmap of model M28Met3 .....                                                                         | 6  |
| Figure 8. Coefficient of determination ( $R^2$ ) obtained in validated model M28Met3 .....                       | 6  |
| Figure 9. Comparison of experimental data vs. predicted data from model M28Met3 .....                            | 7  |
| Table 4. Models performed in validation of the UV radiation method (Met 4) .....                                 | 7  |
| Figure 10. Heatmap of model M3Met4 .....                                                                         | 8  |
| Figure 11. Coefficient of determination ( $R^2$ ) obtained in validated model M3Met4 .....                       | 8  |
| Figure 12. Comparison of experimental data vs. predicted data from model M3Met4 .....                            | 8  |
| Table 5. Models performed in validation of the Dark-Fenton method (Met 5) .....                                  | 9  |
| Figure 13. Heatmap of model M10Met5 .....                                                                        | 10 |
| Figure 14. Coefficient of determination ( $R^2$ ) obtained in validated model M10Met5 .....                      | 10 |
| Figure 15. Comparison of experimental data vs. predicted data from model M10Met5 .....                           | 10 |
| Table 6. Models performed in validation of the Photo-Fenton + H <sub>2</sub> O <sub>2</sub> method (Met 6) ..... | 11 |
| Figure 16. Heatmap of model M20Met6 .....                                                                        | 12 |
| Figure 17. Coefficient of determination ( $R^2$ ) obtained in validated model M20Met6 .....                      | 12 |
| Figure 18. Comparison of experimental data vs. predicted data from model M20Met6 .....                           | 12 |
| Figure 19 HPLC Cephalexin .....                                                                                  | 14 |
| Figure 20 HPLC Cephalexin degradation.....                                                                       | 14 |
| Development INQA-ANN.....                                                                                        | 17 |

Table 1. Models performed in validation of the Ozonization method (Met 1).

| Models        | Selected descriptors |         |        |         |          |         |         | Nodes | R <sup>2</sup> |
|---------------|----------------------|---------|--------|---------|----------|---------|---------|-------|----------------|
| <b>M1Met1</b> | AlogP                | Alogp2  | ATS8v  | VE3_Dt  | MDEC-13  | MLFER_A | VE2_D   | 100   | 0.314          |
| <b>M2Met1</b> | AlogP                | Alogp2  | ATS8v  | VE3_Dt  | MDEC-13  | MLFER_A | VE2_D   | 500   | 0.467          |
| <b>M3Met1</b> | AlogP                | MDEC-13 | AMR    | C3SP2   | SpMax_Dt | GGI9    | MDEC-23 | 200   | 0.688          |
| <b>M4Met1</b> | AlogP                | MDEC-13 | AMR    | C3SP2   | SpMax_Dt | GGI9    | MDEC-23 | 500   | 0.720          |
| <b>M5Met1</b> | VE1_DzZ              | nAtom   | nAtomP | TopoPSA | fragC    | -       | -       | 300   | 0.752          |
| <b>M6Met1</b> | Alogp2               | VE1_DzZ | nAtomP | TopoPSA | fragC    | -       | -       | 200   | 0.729          |
| <b>M7Met1</b> | Alogp2               | VE1_DzZ | nAtomP | TopoPSA | fragC    |         |         | 500   | 0.650          |

Figure 1. Heatmap of model M6Met1

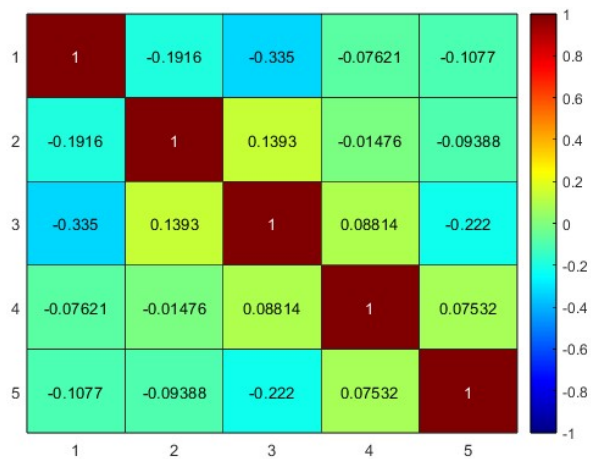

Figure 2. Coefficient of determination (R<sup>2</sup>) obtained in validated model M6Met1

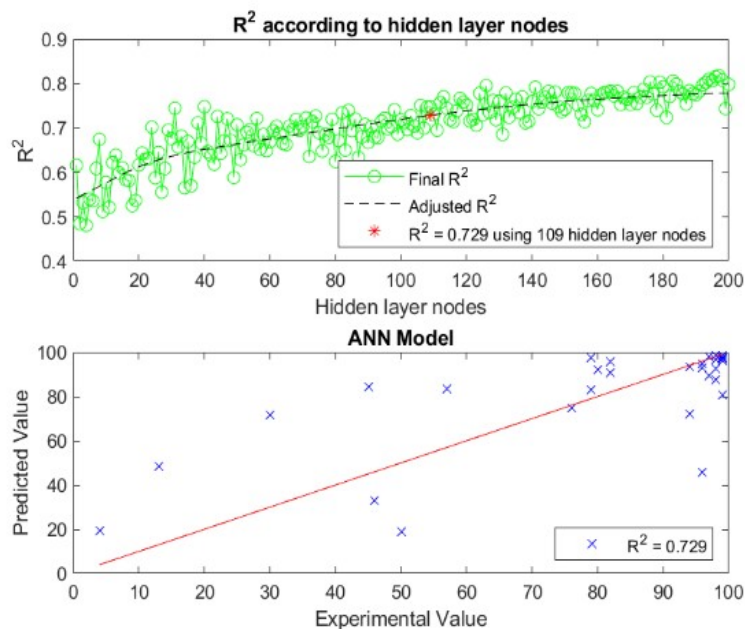

Figure 3. Comparison of experimental data vs. predicted data from model M6Met1

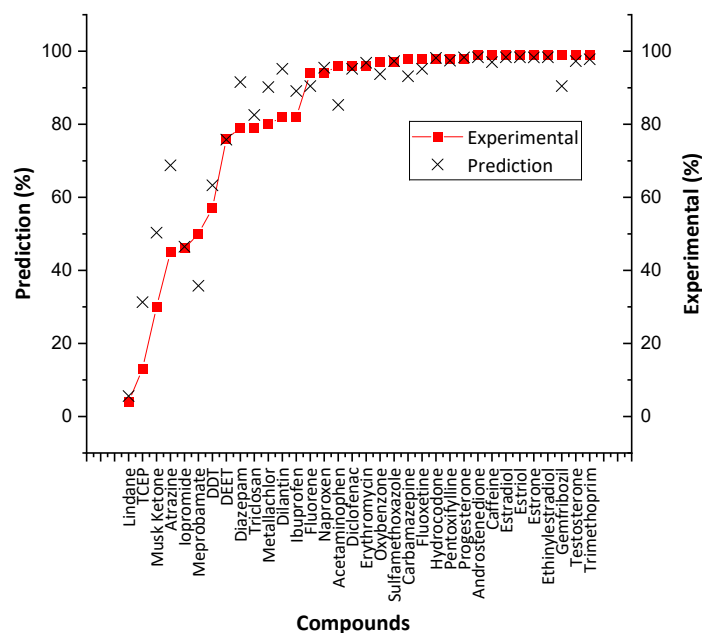

Table 2. Models performed in validation of the Ozonization + H<sub>2</sub>O<sub>2</sub> method (Met 2)

| Models | Selected descriptors |         |        |         |       | Nodes | R <sup>2</sup> |
|--------|----------------------|---------|--------|---------|-------|-------|----------------|
| M1Met2 | ALogp2               | VE1_DzZ | nAtomP | TopoPSA | fragC | 500   | 0.816          |

Figure 4. Heatmap of model M1Met2

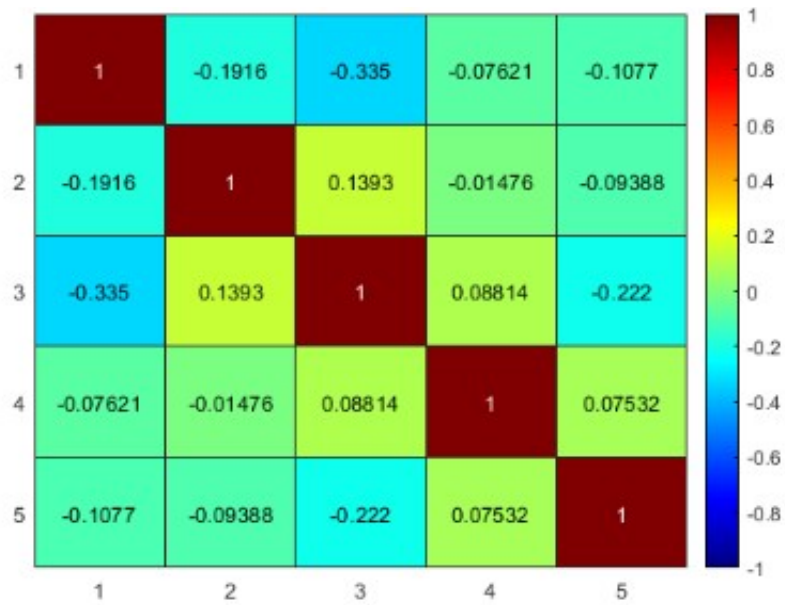

Figure 5. Coefficient of determination ( $R^2$ ) obtained in validated model M1Met2

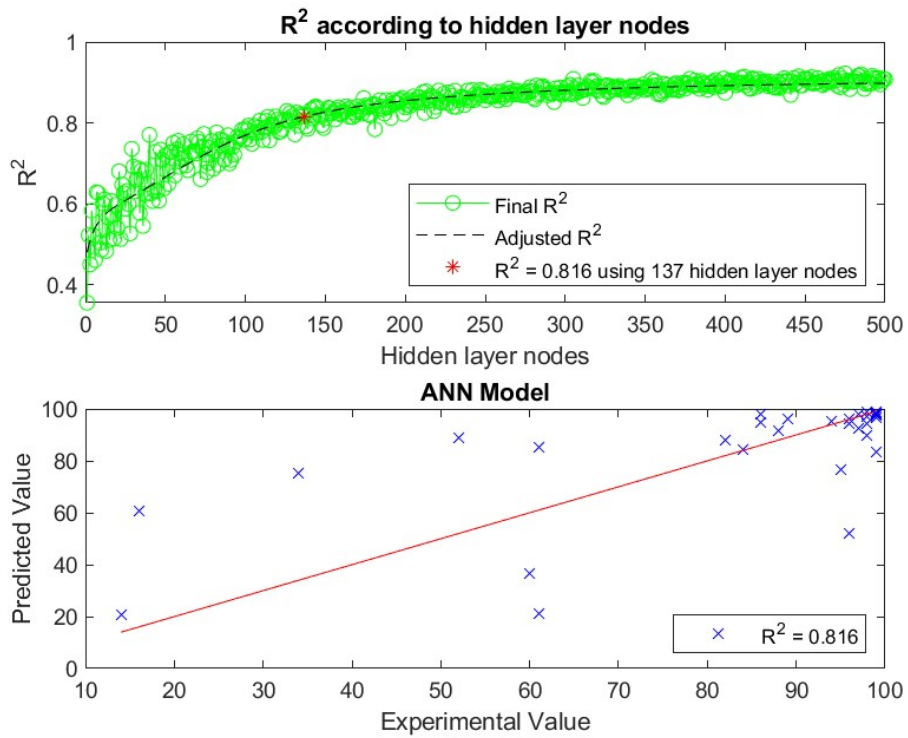

Figure 6. Comparison of experimental data vs. predicted data from model M1Met2

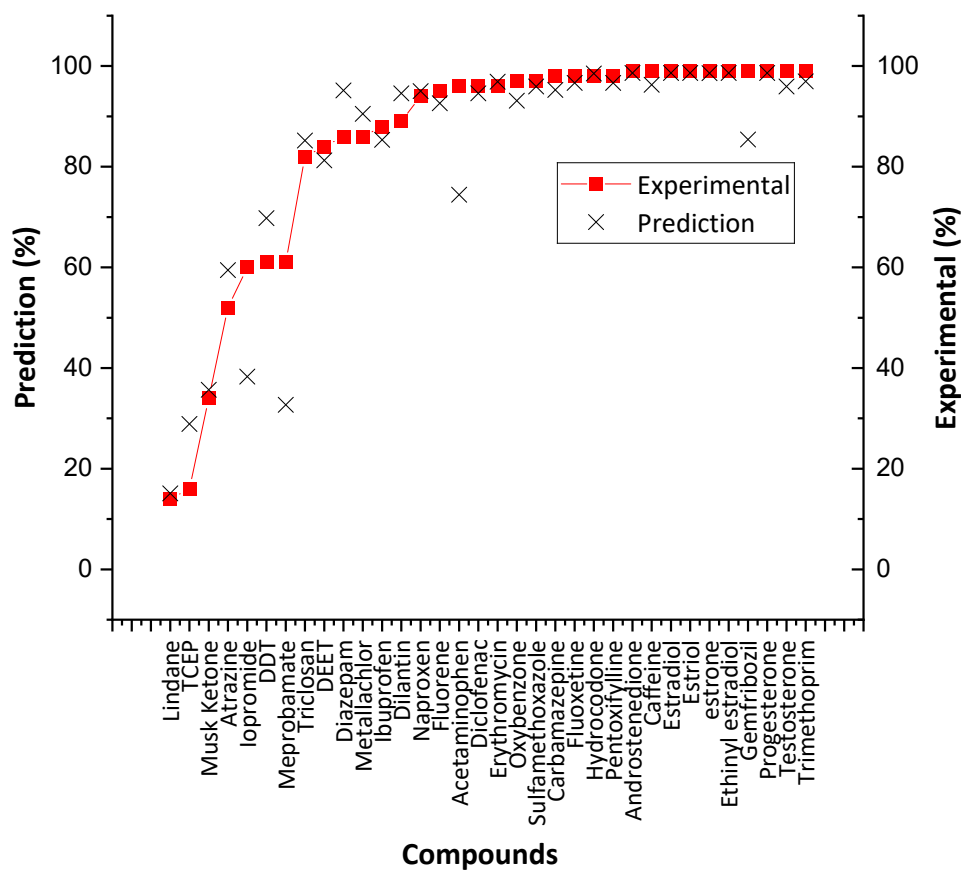

Table 3. Models performed in validation of the activated carbon method (Met 3)

| Models  | Selected descriptors |          |         |        |          | Nodes | R <sup>2</sup> |
|---------|----------------------|----------|---------|--------|----------|-------|----------------|
| M1Met3  | ALogP                | ALogp2   | nAtomLC | VE3_Dt | WTPT-5   | 200   | 0.491          |
| M2Met3  | ALogP                | fragC    | WTPT-4  | VE3_Dt | XLogP    | 250   | 0.492          |
| M3Met3  | ALogP                | fragC    | WTPT-4  | VE3_Dt | MDEC-13  | 300   | 0.598          |
| M4Met3  | ALogP                | ALogp2   | nAtomLC | VE3_Dt | WTPT-5   | 300   | 0.490          |
| M5Met3  | ALogP                | ALogp2   | nAtomLC | VE3_Dt | BCUTw-1h | 300   | 0.687          |
| M6Met3  | ALogP                | ALogp2   | nAtomLC | VE3_Dt | BCUTw-1h | 1000  | 0.689          |
| M7Met3  | ALogP                | fragC    | WTPT-4  | VE3_Dt | MDEC-13  | 800   | 0.588          |
| M8Met3  | ALogP                | ATS3v    | nAtomLC | VE3_D  | BCUTw-1h | 500   | 0.158          |
| M9Met3  | ALogp2               | fragC    | XLogP   | VE3_Dt | BCUTw-1h | 500   | 0.574          |
| M10Met3 | ALogp2               | fragC    | XLogP   | VE3_Dt | BCUTw-1h | 800   | 0.585          |
| M11Met3 | TPSA                 | TopoPSA  | ATS0i   | ALogp2 | fragC    | 300   | 0.183          |
| M12Met3 | ALogP                | apol     | nAtomLC | VE3_Dt | BCUTw-1h | 300   | 0.514          |
| M13Met3 | nAtomLC              | BCUTw-1h | ALogP   | VE3_Dt | ALogp2   | 1500  | 0.694          |

|         |         |          |         |         |          |      |        |
|---------|---------|----------|---------|---------|----------|------|--------|
| M14Met3 | ALogP   | apol     | nAtomLC | VE3_Dt  | BCUTw-1h | 800  | 0.588  |
| M15Met3 | nAtomLC | BCUTw-1h | ALogP   | VE3_Dt  | ALogp2   | 2500 | 0.647  |
| M16Met3 | nAtomLC | BCUTw-1h | ALogP   | VE3_Dt  |          | 800  | 0.444  |
| M17Met3 | AMR     | nAtom    | nAtomP  | TopoPSA |          | 300  | 0.729* |
| M18Met3 | ALogP   | apol     | nAtomLC | VE3_Dt  |          | 500  | 0.361  |
| M19Met3 | VE3_Dt  | nAtom    | nAtomP  | TopoPSA | FragC    | 300  | 1.124* |
| M20Met3 | VE3_Dt  | nAtom    | nAtomP  | TopoPSA |          | 300  | 0.882* |
| M21Met3 | VE1_DzZ | nAtom    | nAtomP  | TopoPSA |          | 300  | 0.679  |
| M22Met3 | fragC   | VE3_Dt   | nAtom   | nAtomP  | TopoPSA  | 300  | 1.122* |
| M23Met3 | nAtomP  | TopoPSA  | fragC   | VE3_Dt  | VE1_DzZ  | 150  | 0.935* |
| M24Met3 | nAtomP  | TopoPSA  | fragC   | VE3_Dt  | VE1_DzZ  | 800  | 0.468  |
| M25Met3 | nAtomP  | TopoPSA  | fragC   | VE3_Dt  | VE1_DzZ  | 300  | 0.977* |
| M26Met3 | nAtomP  | TopoPSA  | fragC   | VE3_Dt  |          | 100  | 0.944* |
| M27Met3 | nAtomP  | TopoPSA  | fragC   | VE1_DzZ |          | 100  | 0.724* |
| M28Met3 | nAtomP  | TopoPSA  | fragC   | VE3_Dt  |          | 500  | 0.970  |

Note: \* Values not taken into account due to high collinearity (Pearson)

Figure 7. Heatmap of model M28Met3

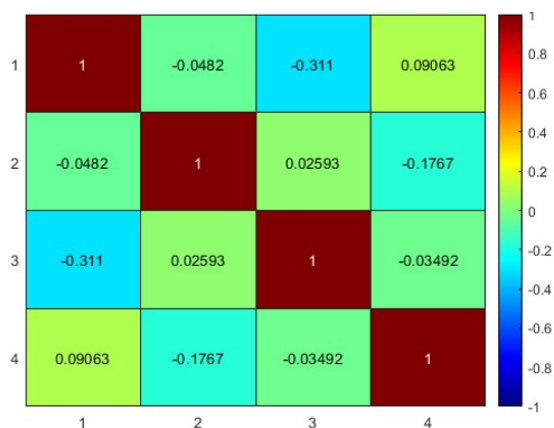

Figure 8. Coefficient of determination ( $R^2$ ) obtained in validated model M28Met3

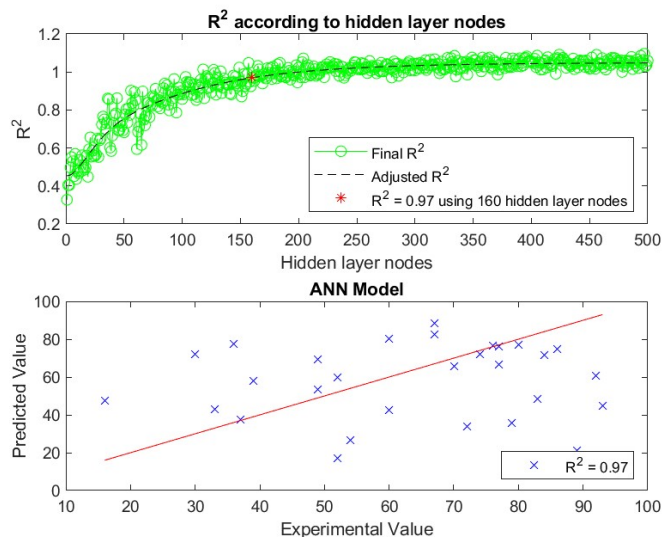

Figure 9. Comparison of experimental data vs. predicted data from model M28Met3

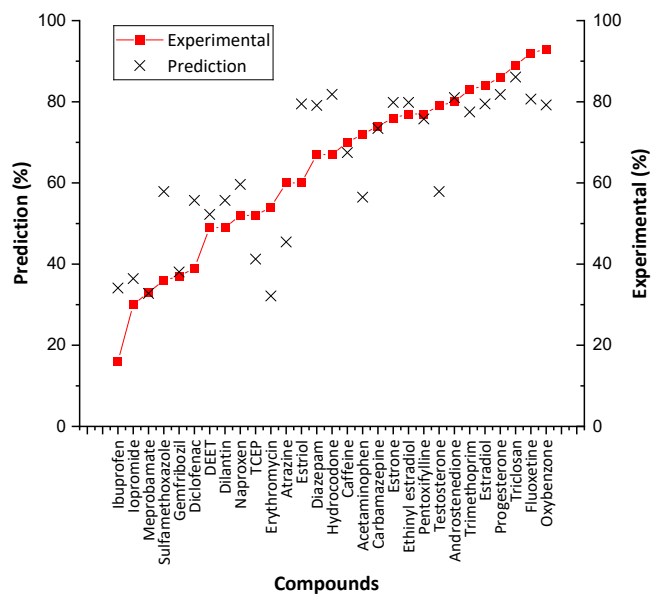

Table 4. Models performed in validation of the UV radiation method (Met 4)

| Models | Selected descriptors |        |         |        | Nodes | R <sup>2</sup> |
|--------|----------------------|--------|---------|--------|-------|----------------|
| M1Met4 | VE1_DzZ              | nAtomP | ALogP   | AATS8v | 100   | 0.495          |
| M2Met4 | VE1_DzZ              | nAtomP | TopoPSA | AATS8v | 100   | 0.744          |
| M3Met4 | VE1_DzZ              | nAtomP | TopoPSA | AATS8v | 700   | 0.760          |

Figure 10. Heatmap of model M3Met4

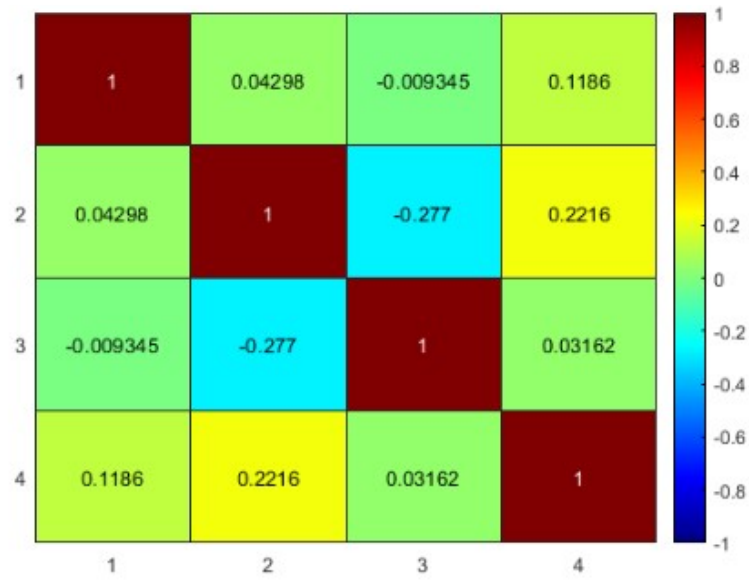

Figure 11. Coefficient of determination ( $R^2$ ) obtained in validated model M3Met4

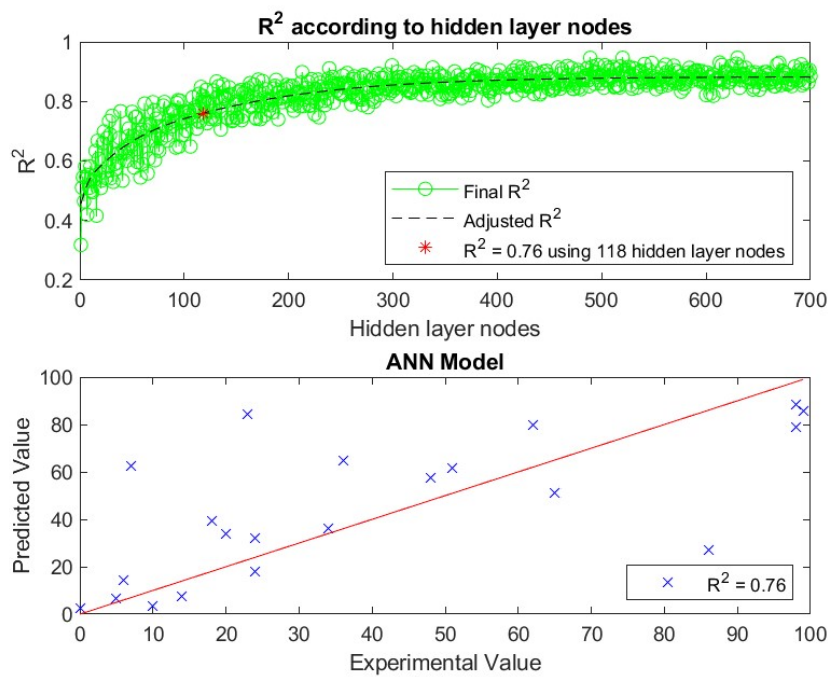

Figure 12. Comparison of experimental data vs. predicted data from model M3Met4



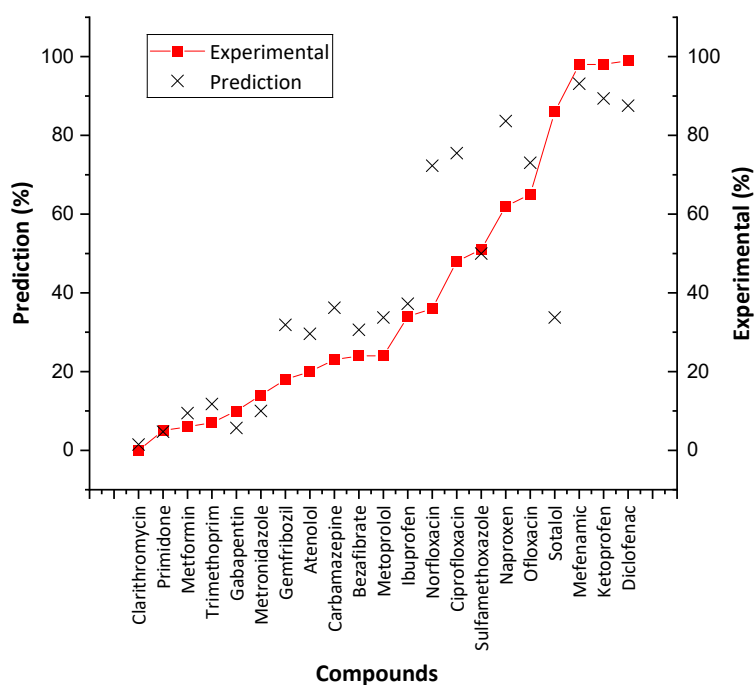

Table 5. Models performed in validation of the Dark-Fenton method (Met 5)

| Models  | Selected descriptors |         |         |          | Nodes | R <sup>2</sup> |
|---------|----------------------|---------|---------|----------|-------|----------------|
| M1Met5  | ALogP                | fragC   | VE1_DzZ | nAtomP   | 100   | 0.236          |
| M2Met5  | ALogP                | fragC   | VE1_DzZ | nAtomP   | 500   | 0.259          |
| M3Met5  | fragC                | ALogP   | nAtomP  | VE1_DzZ  | 150   | 0.241          |
| M4Met5  | nAtomP               | VE1_DzZ | fragC   | ALogP    | 150   | 0.242          |
| M5Met5  | ALogP                | nAtomP  | VE3_Dt  | VE1_DzZ  | 100   | 0.333          |
| M6Met5  | ALogP                | nAtomP  | AMR     | nN       | 100   | 0.522          |
| M7Met5  | VE1_DzZ              | nAtomP  | TopoPSA | AATS8v   | 100   | 0.735          |
| M8Met5  | ALogP                | nAtomP  | AMR     | nN       | 500   | 0.519          |
| M9Met5  | VE1_DzZ              | nAtomP  | TopoPSA | AATS8v   | 500   | 0.774          |
| M10Met5 | VE1_DzZ              | nAtomP  | TopoPSA | AATS8v   | 850   | 0.813          |
| M11Met5 | VE1_DzZ              | nAtomP  | TopoPSA | BCUTp-1h | 100   | 0.406          |
| M12Met5 | VE1_DzZ              | nAtomP  | TopoPSA | GATS4m   | 200   | 0.255          |
| M13Met5 | VE1_DzZ              | nAtomP  | TopoPSA | AATSC1c  | 200   | 0.248          |
| M14Met5 | VE1_DzZ              | nAtomP  | TopoPSA | AATS4e   | 200   | 0.376          |
| M15Met5 | VE1_DzZ              | nAtomP  | TopoPSA | BCUTp-1h | 850   | 0.410          |
| M16Met5 | VE1_DzZ              | nAtomP  | TopoPSA | AATS4e   | 850   | 0.371          |

Figure 13. Heatmap of model M10Met5

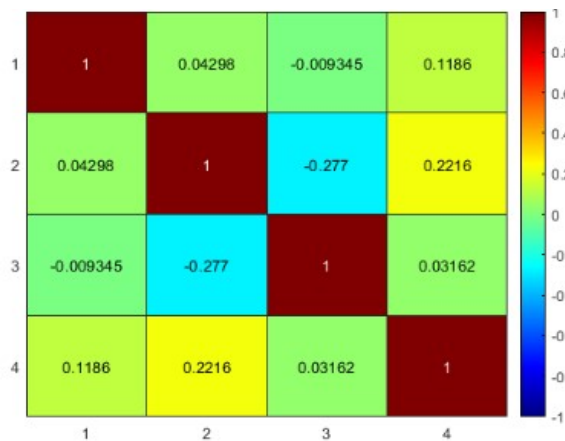

Figure 14. Coefficient of determination ( $R^2$ ) obtained in validated model M10Met5

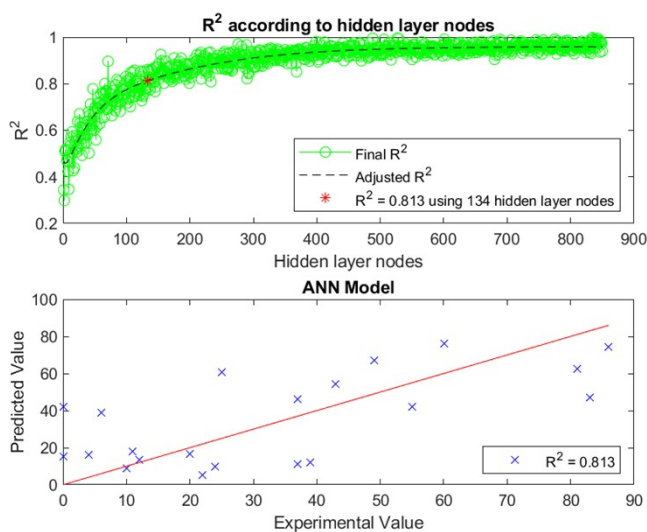

Figure 15. Comparison of experimental data vs. predicted data from model M10Met5

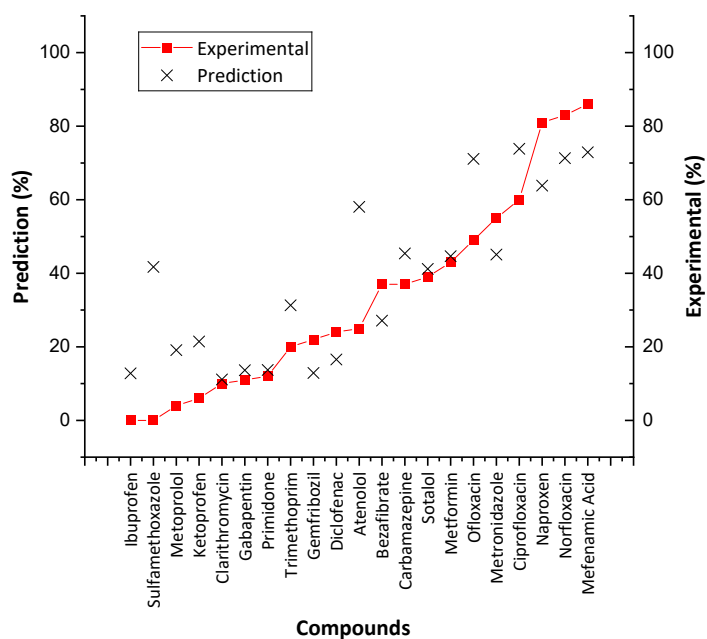

Table 6. Models performed in validation of the Photo-Fenton +  $H_2O_2$  method (Met 6)

| Modelos | Descriptores seleccionados |                |                |             |                    |          | Nodos | R <sup>2</sup> |
|---------|----------------------------|----------------|----------------|-------------|--------------------|----------|-------|----------------|
| M1Met6  | ALogp2                     | R_TpiPCT<br>PC | fragC          | bpol        | VE1_DzZ            | -        | 250   | 0.559          |
| M2Met6  | ALogp                      | ALogp2         | R_TpiPCTP<br>C | fragC       | bpol               | VE1_DzZ  | 250   | 0.266          |
| M3Met6  | ALogP                      | bpol           | Sv             | fragC       | McGowan_<br>Volume | MLFER_A  | 200   | 0.462          |
| M4Met6  | ALogP                      | bpol           | Sv             | fragC       | R_TpiPCTPC         | -        | 200   | 0.574          |
| M5Met6  | ALogP                      | bpol           | Sv             | fragC       | R_TpiPCTPC         | -        | 500   | 0.583          |
| M6Met6  | ALogP                      | ALogp2         | SP-7           | Mi          | FragC              | HybRatio | 250   | 0.324          |
| M7Met6  | ALogP                      | VE1_DzZ        | bpol           | JGI6        | nBondsD            | -        | 250   | 0.225          |
| M8Met6  | VE1_DzZ                    | nAtom          | nAtomP         | TopoPS<br>A | fragC              | -        | 300   | 0.819          |
| M9Met6  | AMR                        | nAtomP         | TopoPSA        | ALogP       | VE1_DzZ            | -        | 300   | 0.369          |
| M10Met6 | VE1_DzZ                    | nAtomP         | fragC          | ALogP       | nN                 | -        | 300   | 0.409          |
| M11Met6 | VE1_DzZ                    | nAtomP         | fragC          | ALogP       | -                  | -        | 200   | 0.485          |
| M12Met6 | VE1_DzZ                    | ALogP          | nAtomP         | Mi          | MLogP              | -        | 200   | 0.393          |
| M13Met6 | VE1_DzZ                    | nAtomP         | TopoPSA        | fragC       | -                  | -        | 200   | 0.697          |
| M14Met6 | VE1_DzZ                    | nAtomP         | fragC          | ALogP       | -                  | -        | 800   | 0.472          |
| M15Met6 | ALogP                      | VE1_DzZ        | nAtomP         | fragC       | -                  | -        | 100   | 0.487          |
| M16Met6 | ALogP                      | VE1_DzZ        | nAtomP         | fragC       | -                  | -        | 600   | 0.487          |
| M17Met6 | VE1_DzZ                    | ALogP          | nAtomP         | Mi          | MLogP              | -        | 600   | 0.391          |
| M18Met6 | ALogp2                     | VE1_DzZ        | nAtomP         | TopoPS<br>A | -                  | -        | 100   | 0.172          |
| M19Met6 | ALogP                      | VE1_DzZ        | nAtomP         | fragC       | -                  | -        | 200   | 0.489          |
| M20Met6 | VE1_DzZ                    | nAtomP         | TopoPSA        | AATS8v      | -                  | -        | 100   | 0.771          |

Figure 16. Heatmap of model M20Met6

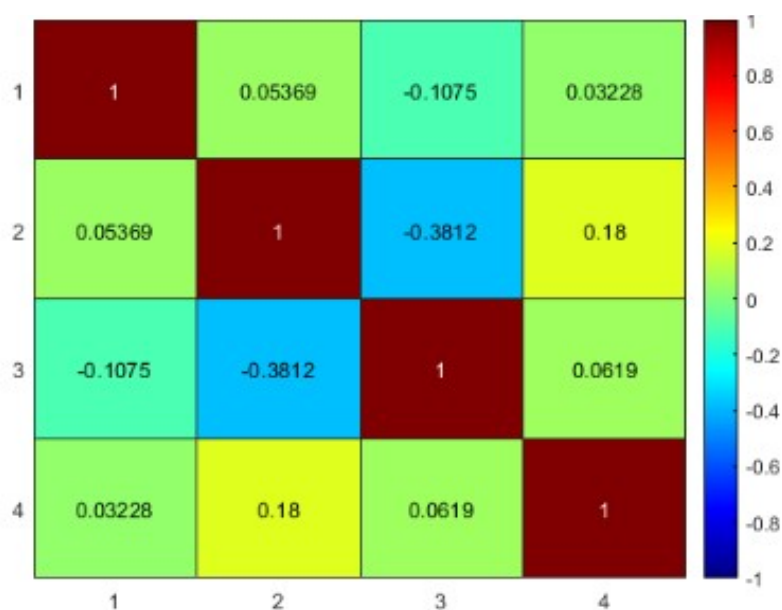

Figure 17. Coefficient of determination (R<sup>2</sup>) obtained in validated model M20Met6

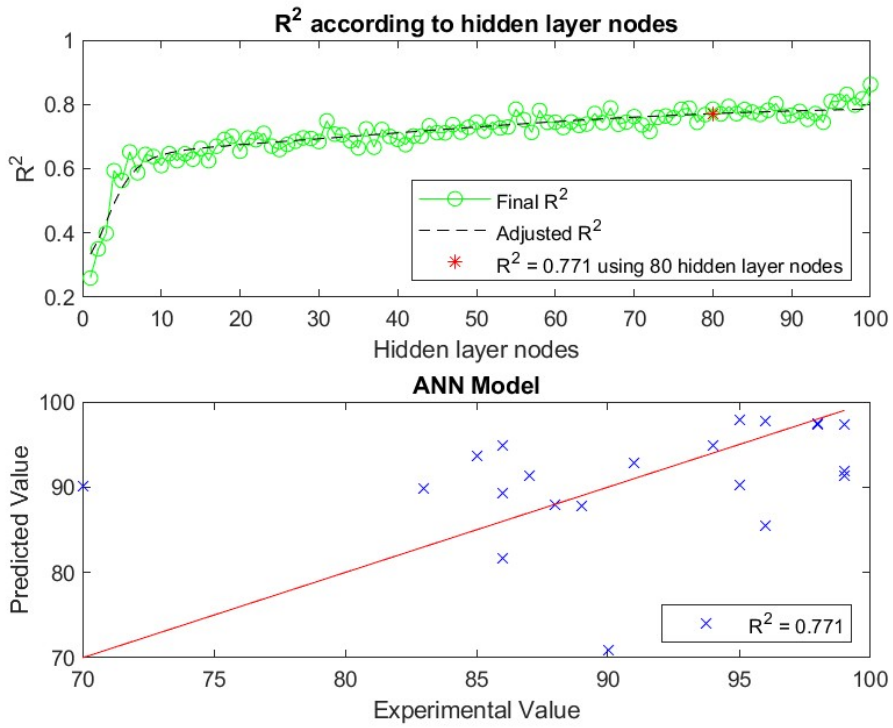

Figure 18. Comparison of experimental data vs. predicted data from model M20Met6

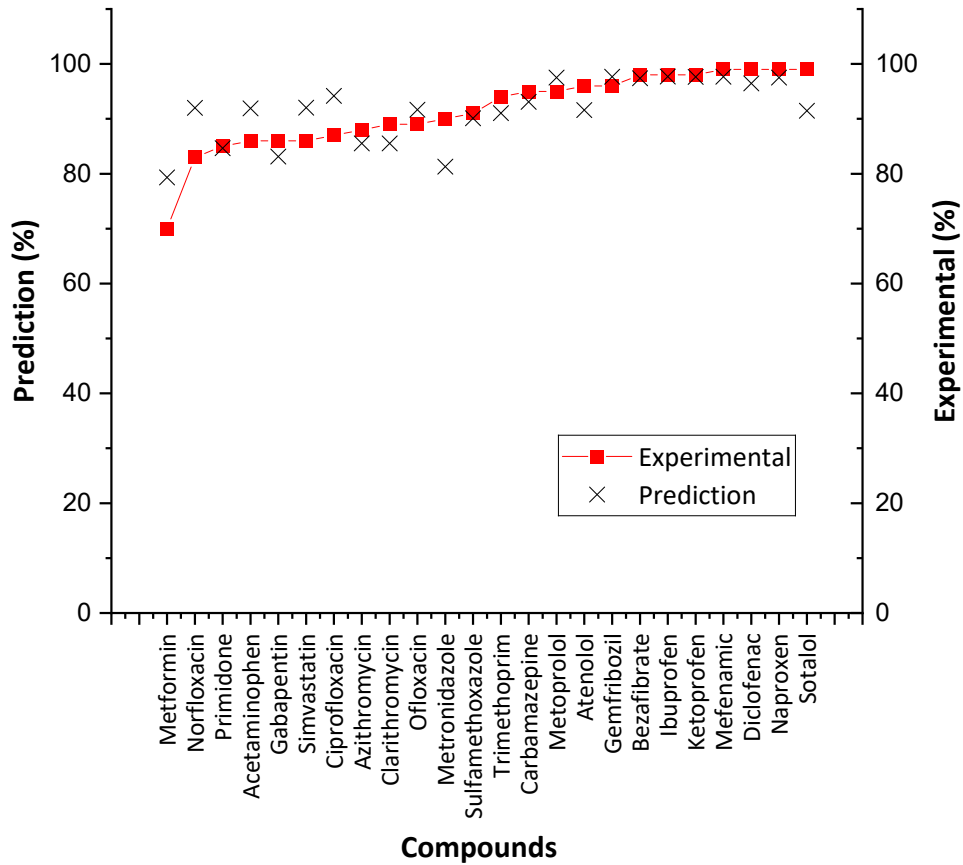

Table 7 Molecules used to create the M6Met1 model.

| Molecules                                                                           | Experimental degradation percentage | Degradation percentage ANN-INQA Predicted |
|-------------------------------------------------------------------------------------|-------------------------------------|-------------------------------------------|
| 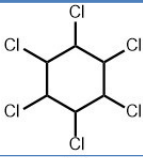   | 4                                   | 6                                         |
|    | 13                                  | 31                                        |
|    | 30                                  | 36                                        |
|    | 45                                  | 46                                        |
|   | 46                                  | 50                                        |
|  | 50                                  | 63                                        |
|  | 57                                  | 69                                        |
|  | 76                                  | 76                                        |
|  | 79                                  | 83                                        |
|  | 79                                  | 85                                        |
|  | 80                                  | 89                                        |

|                                                                                     |    |    |
|-------------------------------------------------------------------------------------|----|----|
| 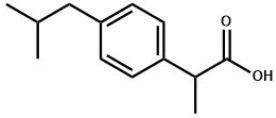    | 82 | 90 |
|    | 82 | 90 |
|    | 94 | 90 |
|    | 94 | 92 |
|    | 96 | 93 |
|   | 96 | 94 |
|  | 96 | 95 |
|  | 97 | 95 |
|  | 97 | 95 |
|  | 98 | 95 |
|  | 98 | 97 |

|                                                                                     |    |    |
|-------------------------------------------------------------------------------------|----|----|
| 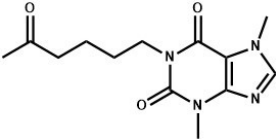    | 98 | 97 |
|    | 98 | 97 |
|    | 98 | 97 |
|    | 99 | 97 |
|    | 99 | 98 |
|   | 99 | 98 |
|  | 99 | 98 |
|  | 99 | 98 |
|  | 99 | 98 |
|  | 99 | 98 |
|  | 99 | 98 |
|  | 99 | 98 |

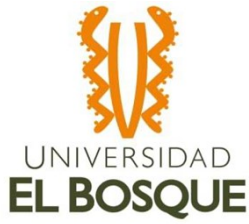

# Laboratorios del Departamento de Química y Programa de Química Farmacéutica

## Manuscript SI

### <Sample Information>

Sample Name : Cefalexina  
Sample ID : Cefalexina 38.8  
Data Filename : CE-5.lcd  
Method Filename : Quercetina nueva columna.lcm

---

|                  |   |                     |              |   |                      |
|------------------|---|---------------------|--------------|---|----------------------|
| Batch Filename   | : |                     | Sample Type  | : | Unknown              |
| Vial #           | : | 1-1                 |              |   |                      |
| Injection Volume | : | 10 uL               |              |   |                      |
| Date Acquired    | : | 17/01/2024 11:56:32 | Acquired by  | : | System Administrator |
| Date Processed   | : | 18/01/2024 10:30:13 | Processed by | : | System Administrator |

### <Chromatogram>

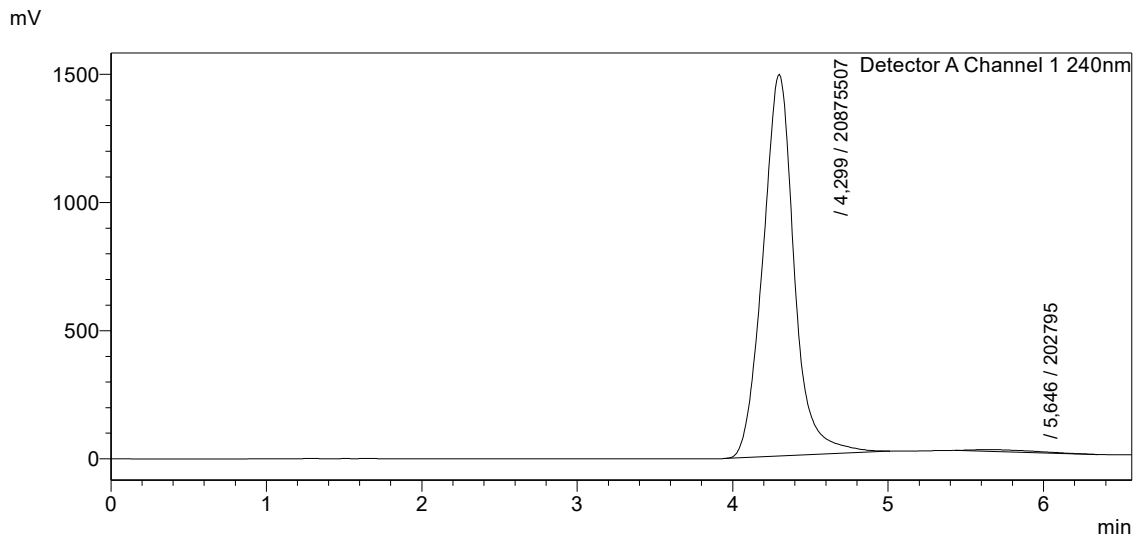

Figure 19



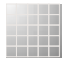

SHIMADZU  
LabSolutions

# Analysis Report

## <Sample Information>

|                  |                            |              |                        |
|------------------|----------------------------|--------------|------------------------|
| Sample Name      | : CEFA OZONO               | Sample Type  | : Unknown              |
| Sample ID        | : Cefa - 92-8-AACN-1.5     |              |                        |
| Data Filename    | : Cefa - 92-8-AACN-1.5.lcd |              |                        |
| Method Filename  | : Cefa - 92-8-AACN-1.5.lcm |              |                        |
| Batch Filename   | :                          |              |                        |
| Vial #           | : 1-46                     |              |                        |
| Injection Volume | : 10 uL                    | Acquired by  | : System Administrator |
| Date Acquired    | : 26/01/2024 11:51:31      | Processed by | : System Administrator |
| Date Processed   | : 26/01/2024 11:59:32      |              |                        |

## <Chromatogram>

mV

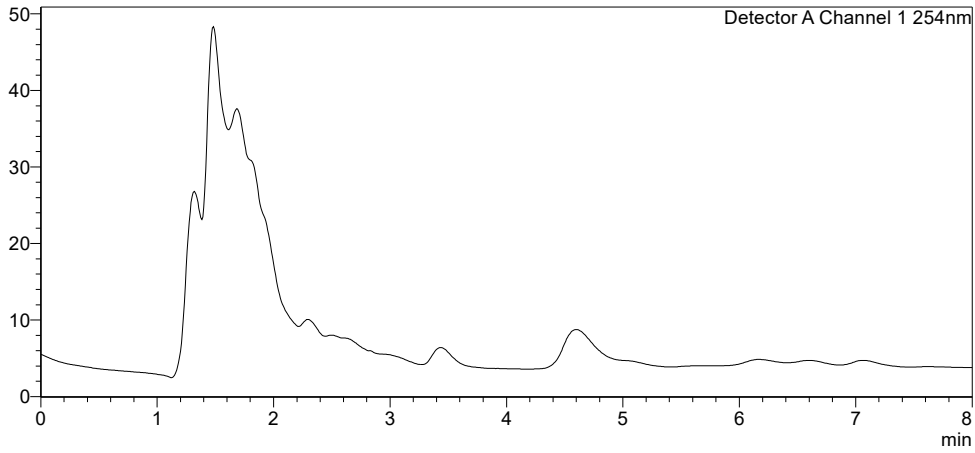

mV

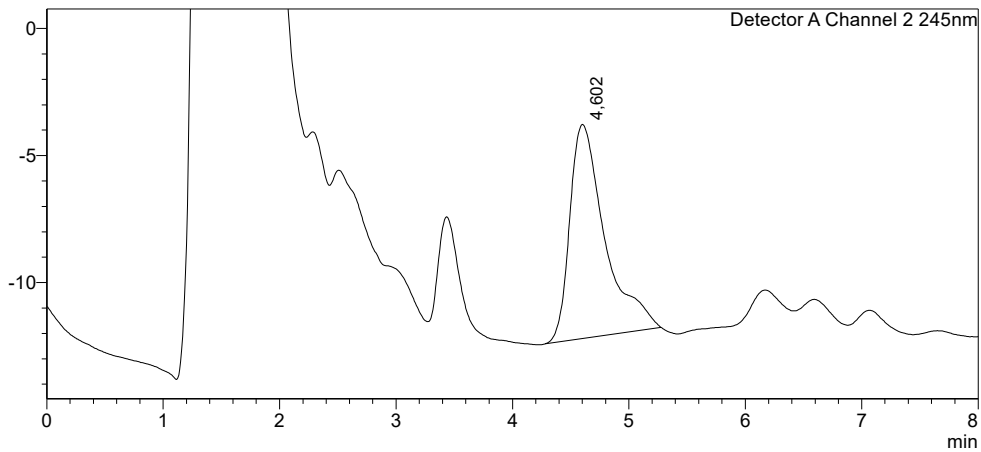

## <Peak Table>

Detector A Channel 1 254nm

Curva de disolución-Quercetina - 2-32 - Cefa - 92-8-AACN-1.5.lcd

Figure 20

## Development of artificial neural network (ANN)

An artificial neural network (ANN) with backpropagation was built, where each input node received a particular molecular descriptor, and the output node generated the predicted response variable (degradation%) (Figure 21). The number of nodes in the hidden layer was modified after each computation, considering the leave-one-out cross-validation method and the determination coefficient (R2) to determine the best-fitting model. Thus, the number of hidden nodes that yielded the best-fitting model (R2 closest to 1) was chosen for the final prediction.

The following section will describe in greater detail the structure of the proposed network, the validation method, and the validation metrics used.

### Neural Network Structure

The proposed neural network (Figure 21) features an initializing algorithm followed by feed-forward and backpropagation algorithms.

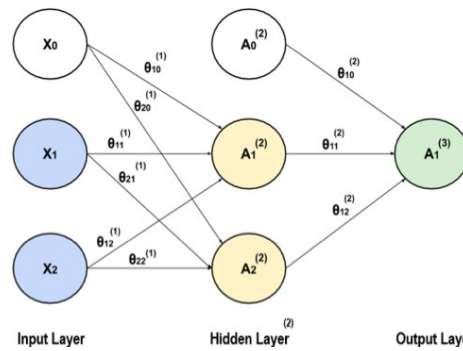

Figure 21 Input Descriptors Output degradation %

Step 1: Initialization:

- Define weights ( $\theta$ ) and bias nodes ( $X_0, A_0$ )
- Initialize weights using a random number, different than zero.
- Set bias nodes equal to 1

Step 1: Initialization:

Figure 1. Structure of Neural Network

- Define weights ( $\theta$ ) and bias nodes ( $X_0, A_0$ )
- Initialize weights using a random number, different than zero.
- Set bias nodes equal to 1

Step 2: Feed-forward:

- Calculate hidden nodes values

$$A_1^{(2)} = g(\theta_{10}^{(1)} X_0 + \theta_{11}^{(1)} X_1 + \theta_{12}^{(1)} X_2) \quad (1-1)$$

$$A_2^{(2)} = g(\theta_{20}^{(1)} X_0 + \theta_{21}^{(1)} X_1 + \theta_{22}^{(1)} X_2) \quad (1-2)$$

- Activate hidden nodes using the Sigmoid function

$$g(z) = \frac{1}{1+e^{-z}} \quad (1-3)$$

Where:  $z = \theta_0 X_0 + \theta_1 X_1 + \dots + \theta_n X_n$

- Calculate output node values.

$$A_1^{(3)} = g(\theta_{10}^{(2)} A_0^{(2)} + \theta_{11}^{(2)} A_1^{(2)} + \theta_{12}^{(2)} A_2^{(2)}) \quad (1-4)$$

Calculate cost function to determine adjustment of output according to the descriptors (error) and include the regularization parameter ( $\lambda$ ) to reduce overfitting.

$$J(\theta) = -\frac{1}{m} \left[ \sum_{i=1}^m y^{(i)} \log h_{\theta}(x^{(i)}) + (1 - y^{(i)}) \log \log (1 - h_{\theta}(x^{(i)})) \right] + \frac{\lambda}{2m} \sum_{j=1}^n \theta_j^2 \quad (1-5)$$

Step 3:

Backpropagation:

Adjust weights ( $\theta$ ) based on error measured between output of the network and input by applying the gradient descent algorithm to the cost function. This step was carried out using equations 1-6 to 1-9, based on Figure 22.

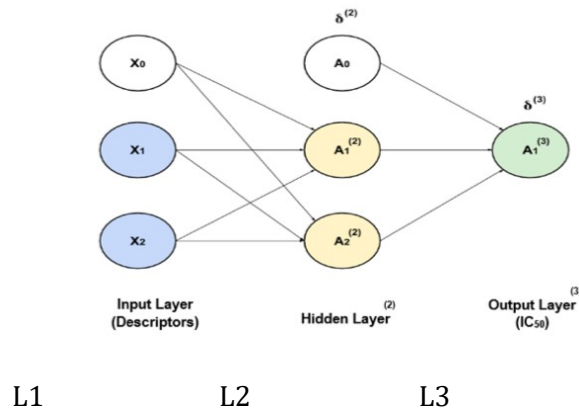

Figure 22

$$\delta_j^{(3)} = A_j^{(3)} - Y_j \quad (1-6)$$

$$\delta_j^{(2)} = \theta^{(2)} \delta^{(3)} * g'(\xi^{(2)}) \quad (1-7)$$

Where:

$$\delta_j^{(L)} = \text{error of node } j \text{ in } L \text{ layer}$$

$$Y_j = \text{value of node } j \text{ in output layer}$$

$$\xi^{(L)} = [1 \ z_1^{(L)} \ \dots \ z_j^{(L)}]$$

- Determine the gradient of the cost function

$$\frac{\partial}{\partial \theta_{ij}^{(L)}} J(\theta) = \frac{1}{m} \Delta_{ij}^{(L)} \text{ if } j = 0 \quad (1-8)$$

$$\frac{\partial}{\partial \theta_{ij}^{(L)}} J(\theta) = \frac{1}{m} [\Delta_{ij}^{(L)} + \lambda \theta_{ij}^{(L)}] \text{ if } j \neq 0 \quad (1-9)$$

Where:

$$\Delta_{ij}^{(L)} := \Delta_{ij}^{(L)} + A_j^{(L)} \delta_i^{(L+1)} \text{ (initialize } \Delta_{ij}^{(L)} = 0)$$

## Validation Method

An exhaustive cross-validation was carried out by the leave-one-out method, in which one instance (molecular descriptors and experimental degradation % of a single molecule) is used as a test set, while all other instances are used as a training set. This process is applied to each molecule of the set; thus, the weight of each cross-validation iteration was determined, and the average of those weights was calculated to predict degradation % values.

Now, the leave-one-out method was selected for validation because the error of estimation didn't vary depending on the data used for the test set and validation, which indicated that the error of estimation was more stable in contrast to other cross-validation methods like k-fold or Montecarlo. Although this method entails a greater computational cost than the other cross-validation methods mentioned, it is commonly used for small data sets such as the one used in this study (36 molecules).
